# Supplementary material for: Neuronal heterogeneity and stereotyped connectivity in the auditory afferent system
Source: PubMed Central journal article supplement (PMC6135759; doi:10.1038/s41467-018-06033-3), 2018-09-12
Supplement: 41467_2018_6033_MOESM1_ESM.pdf [file 41467_2018_6033_MOESM1_ESM.pdf]

## **Description of Additional Supplementary Files**

**File Name:** Supplementary Data 1

**Description:** Adult genetic markers expression profile of SG neurons.

**File Name:** Supplementary Data 2

**Description:** Adult markers of SG neurons subtypes.

**File Name:** Supplementary Data 3

**Description:** P3 genetic markers expression profile of SG neurons.

**File Name:** Supplementary Data 4

**Description:** P3 markers of SG neurons subtypes.
